# Supplementary material for: Titanium dioxide nanotubes modified with nickel oxide and nickel nanoparticles for improved polysulfide anchoring and redox kinetics in lithium–sulfur batteries
Source: Royal Society of Chemistry journal article supplement (doi:10.1039/d6na00263c), 2026-06-19
Supplement: d6na00263c1.pdf [file d6na00263c1.pdf]

## Supplementary Information

Titanium dioxide nanotubes modified with nickel oxide and nickel nanoparticles for improved polysulfide anchoring and redox kinetics in lithium-sulfur batteries

**Emmanuel Siaw<sup>1,2</sup>, Dias Bekeshov<sup>1,2</sup>, Alas Alaskhanov<sup>1,2</sup>, Aishuak Konarov<sup>1</sup>, Zhumabay Bakenov<sup>1,3</sup>, Nurzhan Baikalov<sup>2\*</sup> and Stavros G. Pouloupoulos<sup>1,2\*</sup>**

<sup>1</sup>Department of Chemical and Materials Engineering, Nazarbayev University, Astana 010000, Kazakhstan

<sup>2</sup>National Laboratory Astana, Nazarbayev University, Astana 010000, Kazakhstan

<sup>3</sup>Institute of New Materials and Energy Technologies, Nazarbayev University, 010000, Astana, Kazakhstan

\*corresponding authors email: [nurzhan.baikalov@nu.edu.kz](mailto:nurzhan.baikalov@nu.edu.kz) and [stavros.pouloupoulos@nu.edu.kz](mailto:stavros.pouloupoulos@nu.edu.kz)

---

| Samples              | BET surface area (m <sup>2</sup> g <sup>-1</sup> ) |
|----------------------|----------------------------------------------------|
| TiO <sub>2</sub>     | 82.30                                              |
| NiO/TiO <sub>2</sub> | 84.92                                              |
| Ni/TiO <sub>2</sub>  | 87.71                                              |

---

**Table 1** BET surface area for respective samples.

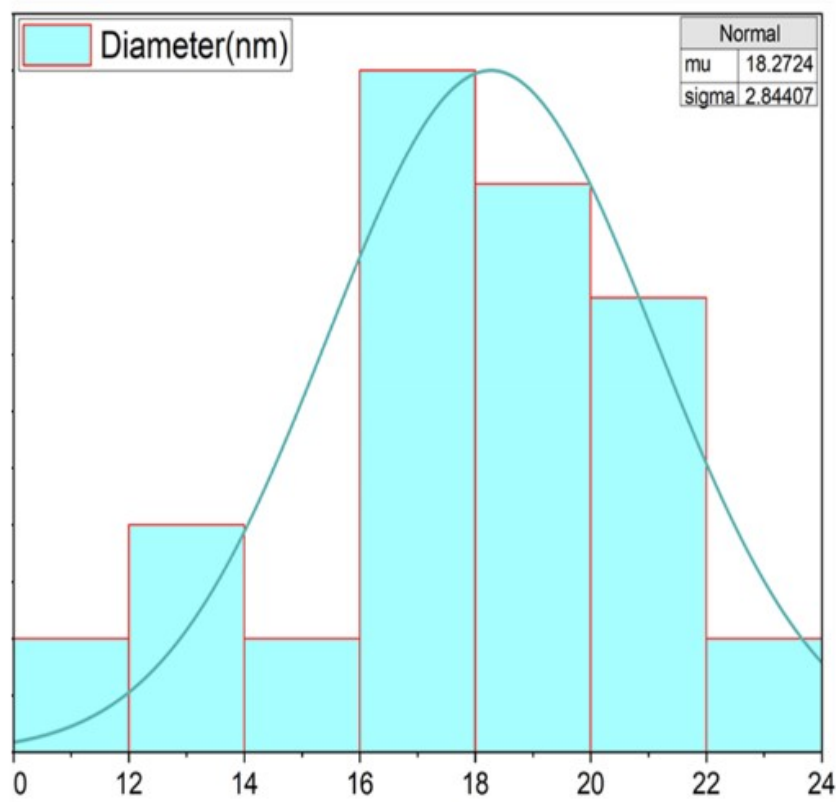

**Fig. S1** Average particle size of nanotube formations.

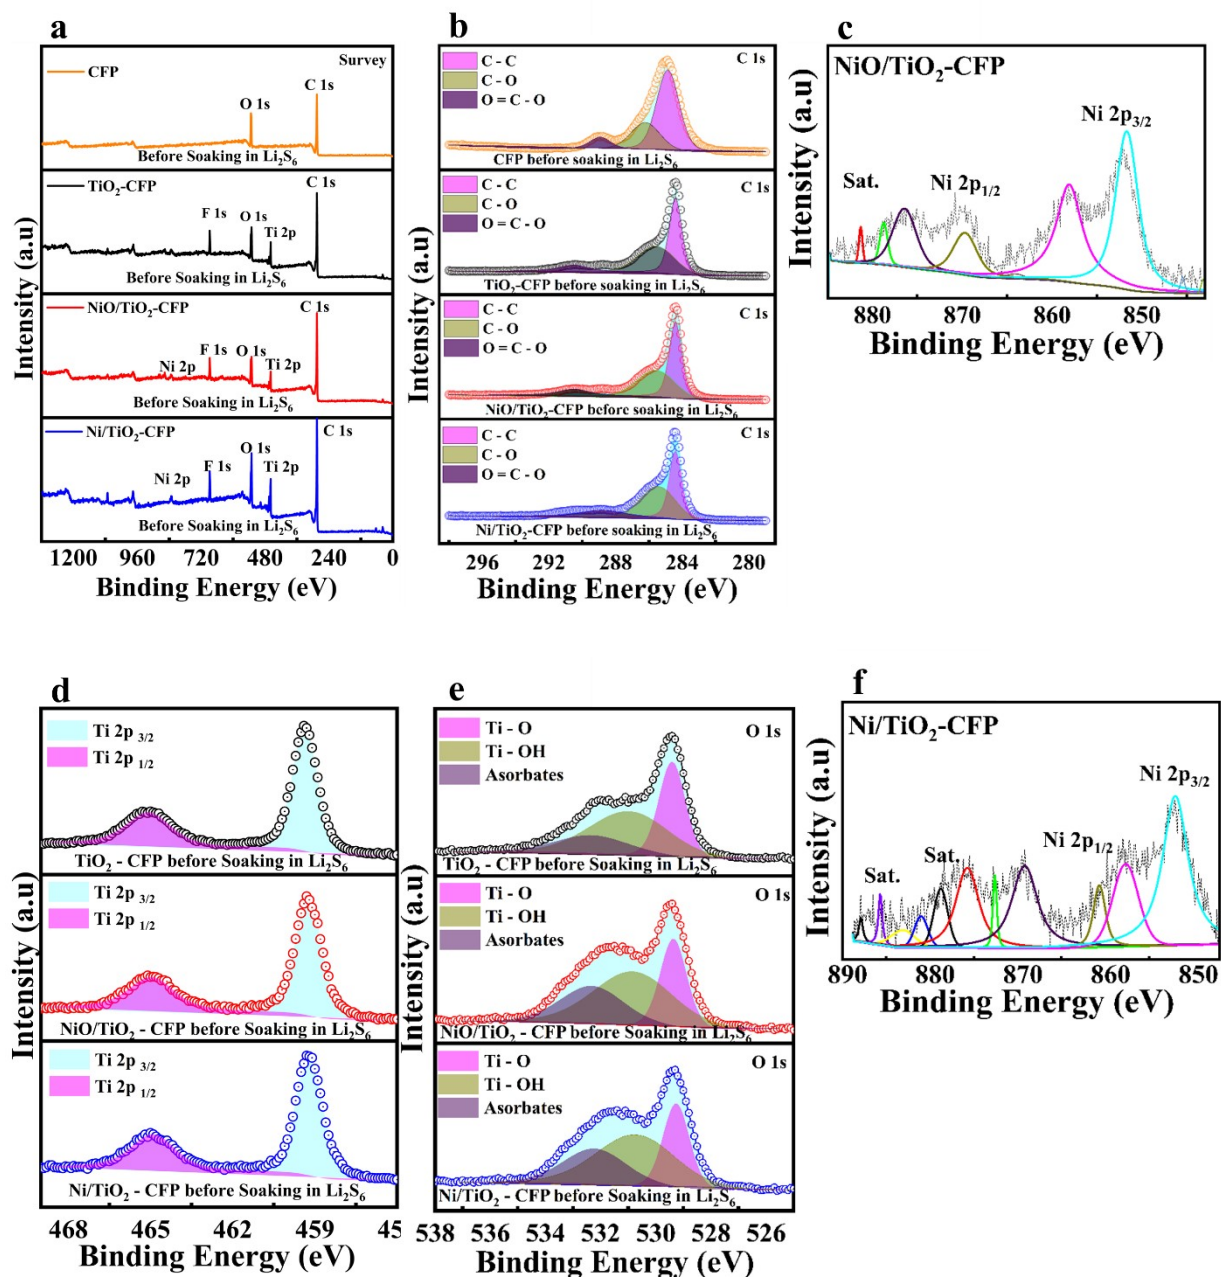

**Fig. S2** XPS characterization of TiO<sub>2</sub>-CFP, NiO/TiO<sub>2</sub>-CFP, and Ni/TiO<sub>2</sub>-CFP electrodes before soaking in Li<sub>2</sub>S<sub>6</sub> solution: (a) survey spectra of all electrodes, (b) C 1s, (c) Ni 2p, (d) O 1s, (e) Ti 2p and (f) Ni 2p

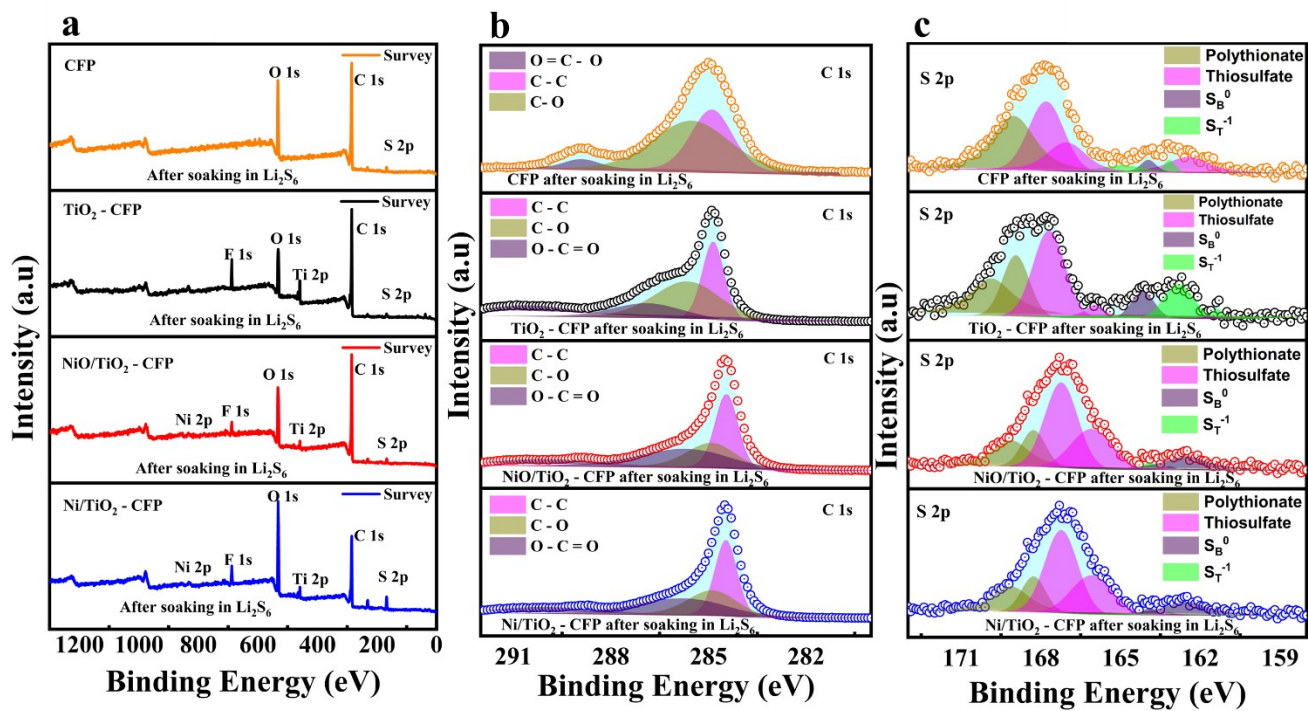

**Fig. S3** XPS characterization of  $\text{TiO}_2$ -CFP,  $\text{NiO/TiO}_2$ -CFP, and  $\text{Ni/TiO}_2$ -CFP electrodes after soaking in  $\text{Li}_2\text{S}_6$  solution (a) survey spectra of all electrodes, (b) C 1s and (c) S 2p.

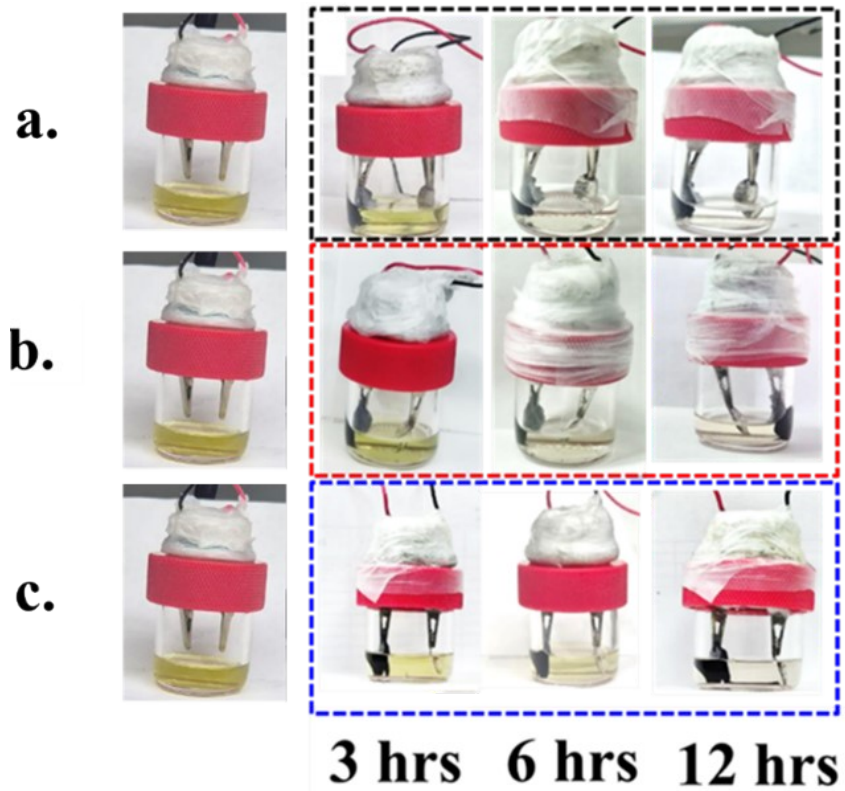

**Fig. S4** Beaker cell test of  $\text{TiO}_2$  based electrodes: (a)  $\text{TiO}_2$ -CFP electrodes at 3, 6 and 12 h respectively, (b)  $\text{NiO}/\text{TiO}_2$ -CFP electrodes at 3, 6 and 12 hrs respectively and (c)  $\text{Ni}/\text{TiO}_2$ -CFP electrodes at 3, 6 and 12 hrs respectively.

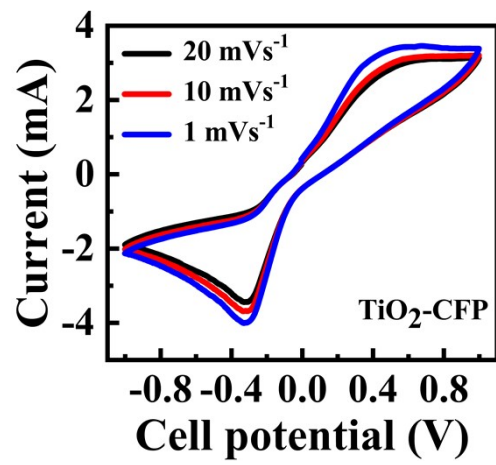

**Fig. S5** CV curves of  $\text{Li}_2\text{S}_6$  symmetric cells with  $\text{TiO}_2$ -CFP electrode at varying scan rates: 1  $\text{mV s}^{-1}$ , 10  $\text{mV s}^{-1}$ , 20  $\text{mV s}^{-1}$ .

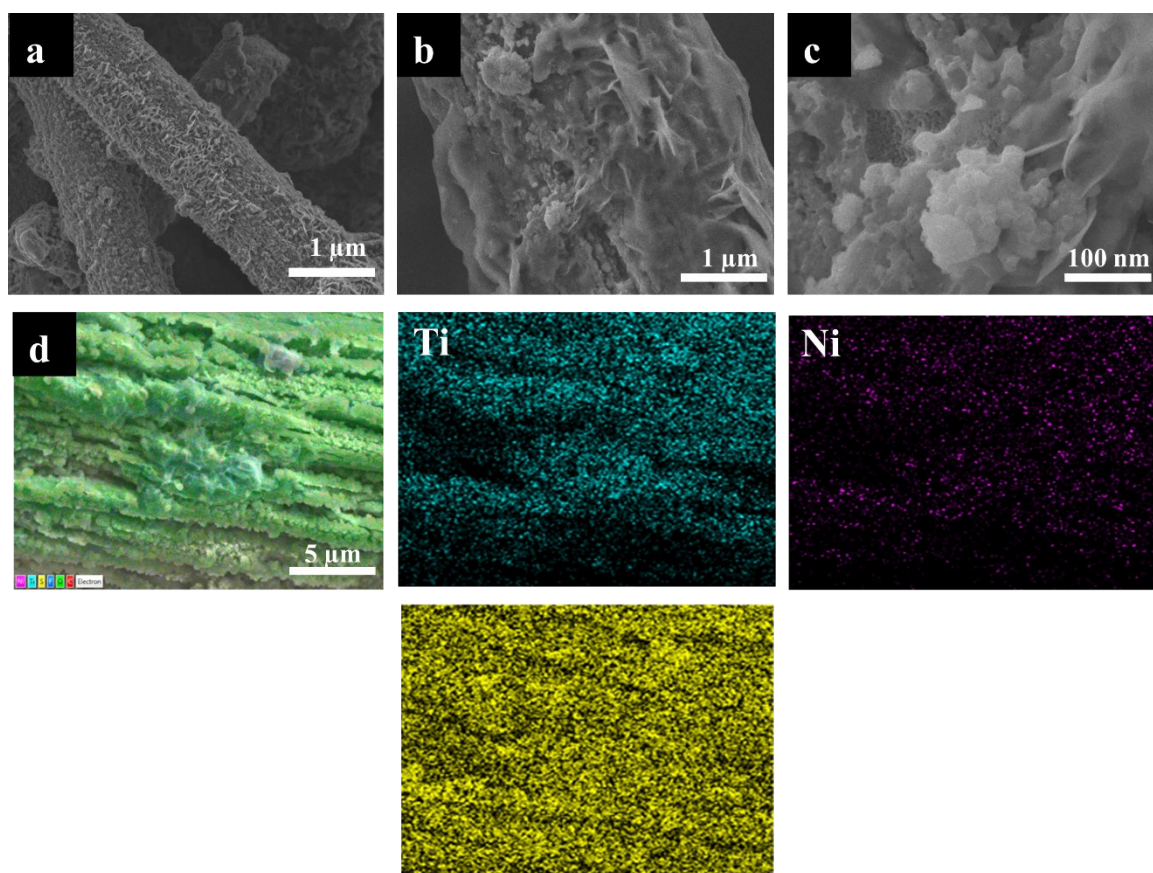

**Fig. S6** SEM image of Ni/TiO<sub>2</sub>-CFP electrode after cycling at (a) 1 μm, (b) 1 μm, (c) 100 nm; EDS mappings of Ni/TiO<sub>2</sub> electrode (d) 5 μm.
